# Supplementary material
Source: publisher site journal article supplement (https://www.dovepress.com/article/221852)
Supplement: Supplementary file 1 [file get_supplementary_file.php]

**Supplementary appendix**

**Supplementary Table 1** Exacerbation frequency between COPD patients who were ICS users and non-users

|  | **Exacerbation Rate/Patient/Year** | | **Rate ratio (95%CI)** | **Effect size** | |
| --- | --- | --- | --- | --- | --- |
|  | Erdosteine | Placebo |  | Difference vs. placebo (%) | p-value |
| **ALL RESTORE PATIENTS** | 0.91 | 1.13 | 0.81 (0.69-0.92) | -19.4 | 0.01 |
| ICS use | 0.93 | 1.16 | 0.80 (0.67-0.94) | -19.5 | 0.02 |
| No ICS use | 0.89 | 1.10 | 0.81 (0.65-0.93) | -19.3 | 0.01 |
| **Moderate COPD patients** |  |  |  |  |  |
| All patients | 0.27 | 0.51 | 0.53 (0.48-0.59) | -47.2 | 0.003 |
| ICS users | 0.30 | 0.54 | 0.56 (0.47-0.63) | -44.4 | 0.002 |
| ICS non-users | 0.26 | 0.49 | 0.53 (0.47-0.59) | -46.9 | 0.003 |
| **Severe COPD patients** |  |  |  |  |  |
| All patients | 1.43 | 1.41 | 0.98 (0.96-1.06) | - | 0.382 |
| ICS users | 1.44 | 1.43 | 0.99 (0.96-1.06) | - | 0.426 |
| ICS non-users | 1.41 | 1.43 | 0.98 (0.96-1.05) | - | 0.398 |

No statistically significant difference has been observed between ICS and non ICS users.

**Abbreviations:** ICS; inhaled corticosteroid

**Supplementary Table 2** Exacerbation duration between COPD patients who were ICS users and non-users

|  | **Erdosteine** | **Placebo** | **%Change** | ***P*-value** |
| --- | --- | --- | --- | --- |
| **Moderate COPD patients (N=254)** | | | | |
| All exacerbations | 9.1 (7.4) | 12.3 (9.6) | -26.0 (5.6) | 0.022 |
| Mild exacerbations | 7.7 (4.9) | 9.8 (8.0) | -21.4 (5.0) | 0.037 |
| Moderate-to-severe exacerbations | 10.5 (8.5) | 13.7 (10.4) | -23.4 (4.8) | 0.040 |
| **ICS (N= 135)** |  |  |  |  |
| All exacerbations | 9.3 (7.7) | 12.5 (9.8) | -22.4 (5.9) | 0.041 |
| Mild exacerbations | 7.9 (5.9) | 10.1 (8.3) | -21.8 (5.2) | 0.028 |
| Moderate-to-severe exacerbations) | 10.9 (9.2) | 14.0 (11.8) | -22.1 (4.8) | 0.049 |
| **No ICS (N= 119)** | | | | |
| All exacerbations | 9.0 (7.3) | 12.1 (9.8) | -25.6 (5.4) | 0.019 |
| Mild exacerbations | 7.8 (5.4) | 9.7 (8.1) | -19.6 (5.1) | 0.048 |
| Moderate-to-severe exacerbations | 10.7 (8.8) | 13.9 (9.8) | -23.0 (5.0) | 0.043 |

No statistically significant difference has been observed between ICS and non ICS users.

**Abbreviations:** ICS; inhaled corticosteroid

**Supplementary Table 3** Time to first exacerbation (in days) by COPD severity, treatment group and ICS use

|  | **Erdosteine** | | **Placebo** | | **%Change** | ***P*-value** |
| --- | --- | --- | --- | --- | --- | --- |
|  | **n** | **Mean (SD)** | **n** | **Mean (SD)** |  |  |
| **Moderate COPD patients** |  |  |  |  |  |  |
| All patients | 163 | 182 (19) | 161 | 169 (25) | +7.7 | <0.001 |
| ICS users | 30 | 180 (23) | 32 | 168 (24) | +7.1 | <0.001 |
| ICS non-users | 133 | 185 (18) | 129 | 170 (23) | +8.8 | <0.001 |
| **Severe COPD patients** |  |  |  |  |  |  |
| All patients | 61 | 153 (28) | 62 | 150 (31) | +2.0 | 0.268 |
| ICS users | 33 | 151 (30) | 39 | 149 (28) | +1.3 | 0.462 |
| ICS non-users | 28 | 152 (29) | 23 | 148 (33) | +2.7 | 0.215 |
| **All RESTORE patients** |  |  |  |  |  |  |
| All patients | 224 | 171 (27) | 231 | 164 (28) | +3.6 | 0.020 |
| ICS users | 63 | 173 (29) | 71 | 166 (27) | +4.0 | 0.028 |
| ICS non-users | 161 | 171 (24) | 160 | 165 (28) | +3.5 | 0.048 |

**Abbreviations:** ICS; inhaled corticosteroid

**Supplementary Table 4** Blood eosinophil counts at baseline (randomization) and end of the study (after 12 months of treatment) according to COPD severity and treatment group

| **Blood eosinophil counts** | **Moderate COPD** | | | |
| --- | --- | --- | --- | --- |
| **Erdosteine (n=115)** | | **Placebo (n=116)** | |
| **Baseline** | **12 months** | **Baseline** | **12 months** |
| Cells/μl, mean (SD) | 160.4 (18.3) | 154.6 (13.9) | 158.9 (19.9) | 160.1 (15.2) |
| >150 cells/μl, n (%) | 39 (33.9) | 37 (32.2) | 38 (32.7) | 37 (31.9) |
|  | **Severe COPD** | | | |
|  | **Erdosteine (n=83)** | | **Placebo (n=107)** | |
|  | **Baseline** | **12 months** | **Baseline** | **12 months** |
| Cells/μl, mean (SD) | 184.8 (22.4) | 174.2 (20.8) | 181.4 (24.7) | 173.7 (24.3) |
| >150 cells/μl, n (%) | 45 (54.2) | 42 (50.6) | 56 (52.3) | 55 (51.4) |

**Notes:** Data are presented for patients with measurements at both baseline and 12 months in each treatment group.

Within each treatment group, there was no significant difference in blood eosinophils counts from baseline to 12 months. Likewise, there was no significant difference between treatment groups at either baseline or 12 months for patients with moderate or severe COPD.

Patients with severe COPD had significantly higher blood eosinophil counts than patients with moderate COPD at both time points and in both treatment groups (all p<0.05)
